# Supplementary material
Source: PubMed Central journal article supplement (PMC6202199)
Supplement: NIHMS975555-supplement-Acknowledgment_form.pdf [file NIHMS975555-supplement-Acknowledgment_form.pdf]

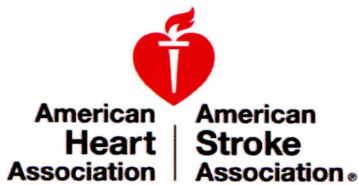

## Acknowledgment Permission Form

Journal Stroke

Manuscript Number STROKE/2018/022056DR1

First Author Siu-Lung Chan

Title of Work INHIBITION OF PAI-1 IMPROVES BRAIN COLLATERAL PERFUSION AND INJURY AFTER ACUTE ISCHEMIC STROKE IN AGED HYPERTENSIVE RATS

Authors must provide written permission/approval from all individuals mentioned by name in the Acknowledgments section of a submitted manuscript. By signing this form, any and all acknowledged persons therefore state that they have read and approved the mention of their names in the Acknowledgment section of the aforementioned paper.

| Name                          | Signature          | Date           |
|-------------------------------|--------------------|----------------|
| Name (1) <u>Abbie Johnson</u> | <u>[Signature]</u> | <u>6/11/18</u> |
| Name (2) <u>Sarah Tremble</u> | <u>[Signature]</u> | <u>6.11.18</u> |
| Name (3) _____                | Signature _____    | Date _____     |
| Name (4) _____                | Signature _____    | Date _____     |
| Name (5) _____                | Signature _____    | Date _____     |
| Name (6) _____                | Signature _____    | Date _____     |
| Name (7) _____                | Signature _____    | Date _____     |
| Name (8) _____                | Signature _____    | Date _____     |
| Name (9) _____                | Signature _____    | Date _____     |
| Name (10) _____               | Signature _____    | Date _____     |
| Name (11) _____               | Signature _____    | Date _____     |
| Name (12) _____               | Signature _____    | Date _____     |
| Name (13) _____               | Signature _____    | Date _____     |
| Name (14) _____               | Signature _____    | Date _____     |
| Name (15) _____               | Signature _____    | Date _____     |
| Name (16) _____               | Signature _____    | Date _____     |
| Name (17) _____               | Signature _____    | Date _____     |
| Name (18) _____               | Signature _____    | Date _____     |
| Name (19) _____               | Signature _____    | Date _____     |
| Name (20) _____               | Signature _____    | Date _____     |
